# Supplementary material for: Arctic spring and summertime aerosol optical depth baseline from long-term observations and model reanalyses, with implications for the impact of regional biomass burning processes
Source: Copernicus journal article supplement (doi:10.5194/acp-2021-805), 2021-11-03
Supplement: Supplementary file 1 [file acp-2021-805-supplement.pdf]

3 **Arctic spring and summertime aerosol optical depth climatological, inter-annual**  
4 **trend and extreme event statistics derived from model reanalyses, remote**  
5 **sensing retrievals and ground observations, with implications for the impact of**  
6 **regional biomass burning processes**

7  
8 Peng Xian<sup>1</sup>, Jianglong Zhang<sup>2</sup>, Travis D. Toth<sup>3</sup>, Blake Sorenson<sup>2</sup>, Peter R. Colarco<sup>4</sup>, Zak  
9 Kipling<sup>5</sup>, Norm T. O'Neill<sup>6</sup>, Edward J. Hyer<sup>1</sup>, James R. Campbell<sup>1</sup>, Jeffrey S. Reid<sup>1</sup> and Keyvan  
10 Ranjbar<sup>6</sup>

11 <sup>1</sup>Naval Research Laboratory, Monterey, CA, USA.

12 <sup>2</sup>Department of Atmospheric Sciences, University of North Dakota, Grand Forks, ND

13 <sup>3</sup>NASA Langley Research Center, Hampton, Virginia, USA.

14 <sup>4</sup>NASA Goddard Space Flight Center, Greenbelt, MD, USA.

15 <sup>5</sup>European Centre for Medium-Range Weather Forecasts, Reading, UK.

16 <sup>6</sup>Département de géomatique appliqué, Université de Sherbrooke, Sherbrooke, Québec, Canada

17 Correspondence: Peng Xian ([peng.xian@nrlmry.navy.mil](mailto:peng.xian@nrlmry.navy.mil))

18 Discussion of Table 1 in terms of difference between FMF vs. SMF and arithmetic vs geometric  
19 statistics:

20 The CM AODs of Table 1 tend to be substantially higher than the values reported in Aboel-  
21 Fetouh et al. (2020) for common sites of Barrow, Resolute Bay, Thule and Hornsund (MAM and  
22 JJA arithmetic averages of 0.031 and 0.016 vs ~ geometric means of 0.02 and 0.002  
23 respectively). Part of the reason for this is the difference between their SMF approach and our  
24 FMF approach (as per the next paragraph, our FMFs transform to larger SMFs) and the fact that  
25 they used geometric means as opposed to our arithmetic means. If we employ the average FMF  
26 to SMF (SDA to Aboel-Fetouh et al. change in FMF) we obtain a CM AOD decrease (averaged  
27 over the 4 common sites) of 0.012 and 0.015 for the MAM and JJA periods. If we employ the  
28 arithmetic to geometric statistics transformations given in Hesaraki et al. (2017) we obtain a  
29 mean reduction in our CM AOD of 0.012 and 0.008 for MAM and JJA respectively (again  
30 averaged over the four common sites). These substantial reductions in CM AOD would produce  
31 CM AOD values that were ~ those in Aboel-Fetouh et al. (2020). The associated changes in FM  
32 AOD would be significantly less important in a relative sense. The reanalysis results of Table 1  
33 would, of course, be subject to the same types of FMF to SMF and arithmetic to geometric  
34 transformations as the data.

35

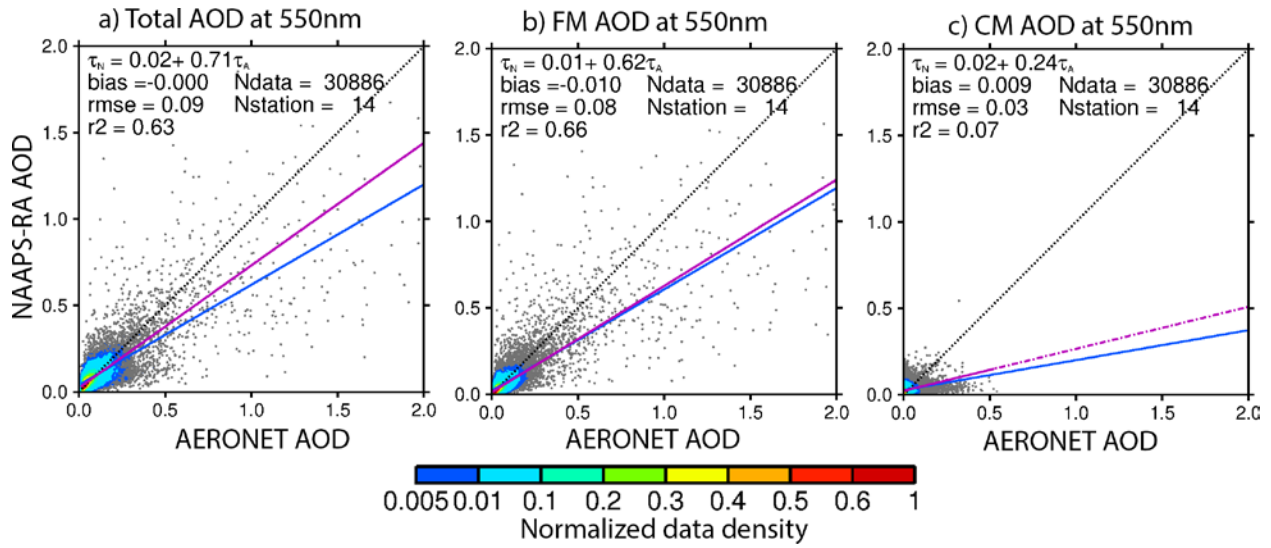

36

37 **Figure S1.** Pairwise comparison of the NAAPS-RA 6-hrly AOD and AERONET AOD with  
38 respect to total (left), fine (middle) and coarse (right) modes at 550 nm for sites north of 60N for  
39 2003–2019. The normalized data density is shown in color. The solid magenta line represents a  
40 Theil–Sen linear regression and the corresponding equation is shown, where  $\tau_N$  is the NAAPS-  
41 RA AOD and  $\tau_A$  is the AERONET AOD. The solid blue line is a least-squares linear regression  
42 and the corresponding equation is not shown. Also shown are the bias, root mean square error  
43 (rmse), coefficient of determination ( $r^2$ ), total number of stations (Nstation) and total number of  
44 6-hrly AERONET data (Ndata).

45

46

47

48

49

50

51

52

53

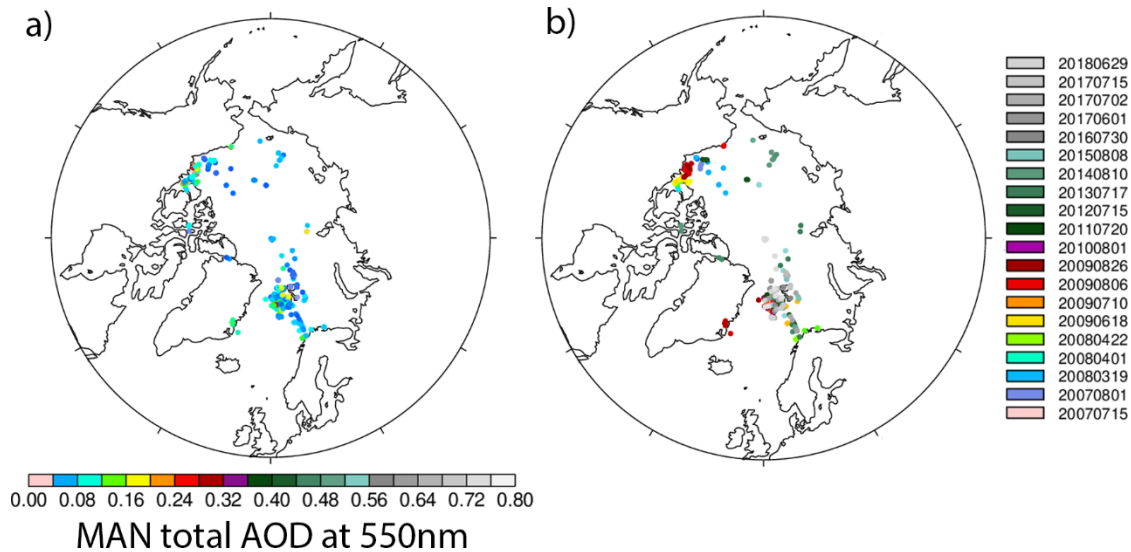

54  
55  
56  
57  
58  
59

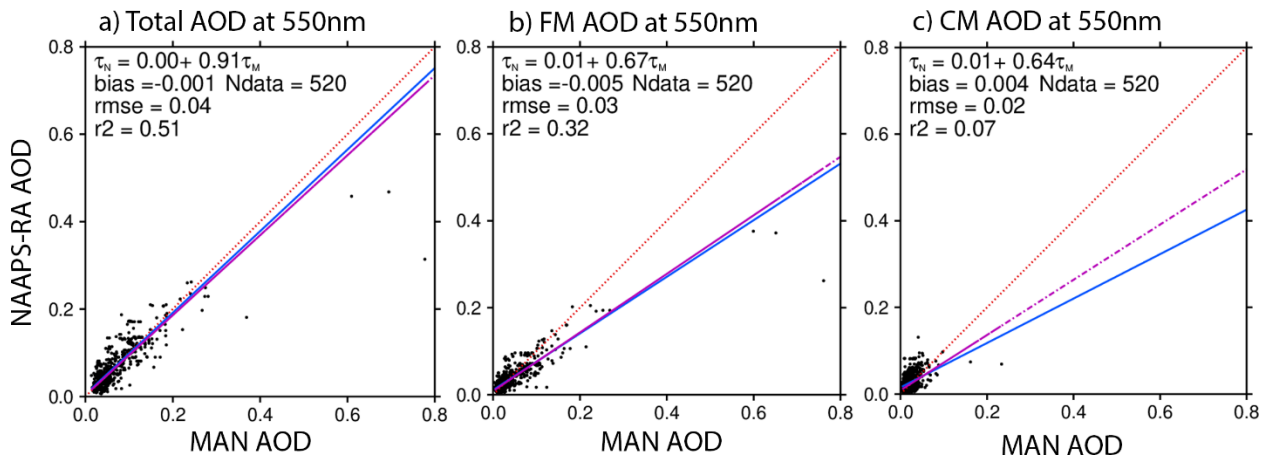

60  
61  
62  
63  
64  
65  
66  
67  
68  
69  
70  
71  
72  
73  
74

**Figure S3.** Pairwise comparison of the NAAPS-RA 6-hrly AOD and MAN AOD with respect to total (left), fine (middle) and coarse (right) modes at 550 nm for north of 70N for 2003–2019. The solid magenta line represents a Theil–Sen linear regression and the corresponding equation is shown, where  $\tau_N$  is the NAAPS-RA AOD and  $\tau_M$  is the MAN AOD. The solid blue line is a least-squares linear regression and the corresponding equation is not shown. Also shown are the bias, root mean square error (rmse), coefficient of determination ( $r^2$ ), total number of 6-hrly MAN data (Ndata).
